# Supplementary material
Source: PubMed Central journal article supplement (PMC7110143)

A

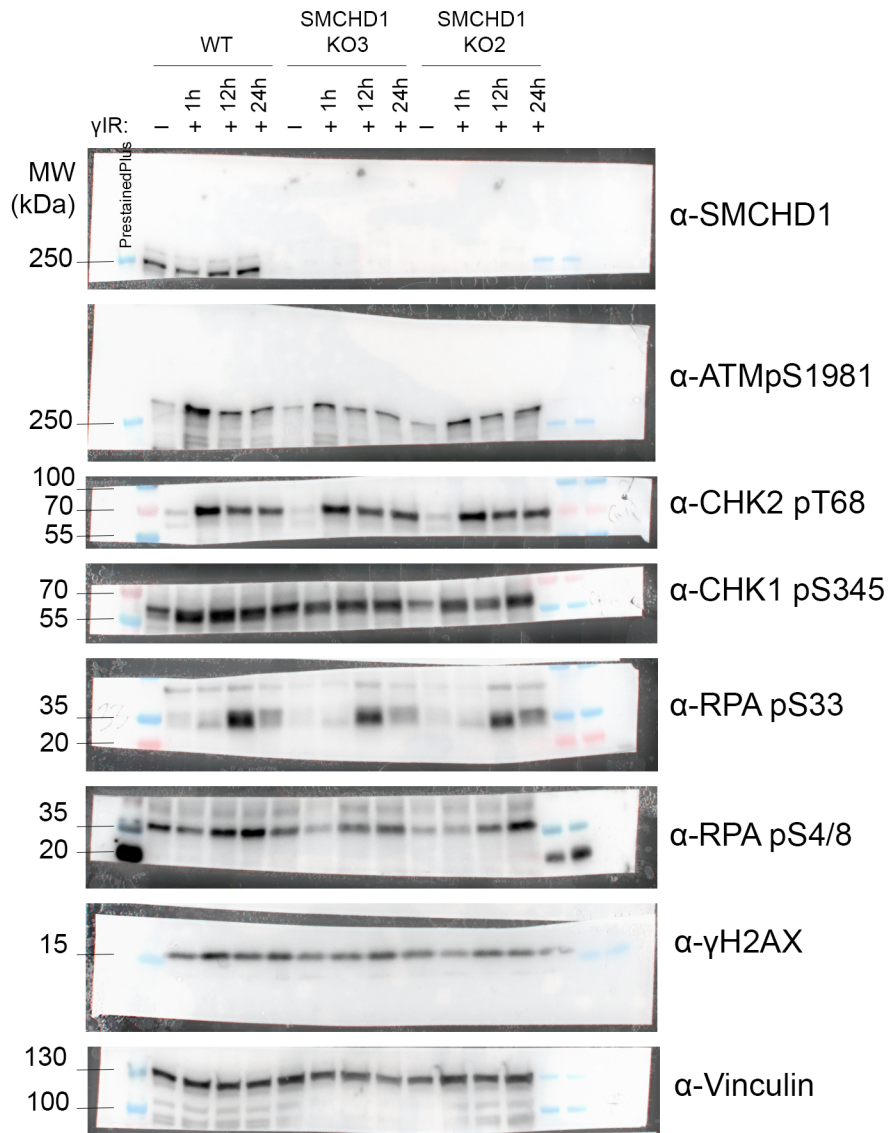

Supplement: EMBJ-39-e102668-s005.pdf [file EMBJ-39-e102668-s005.pdf]

A

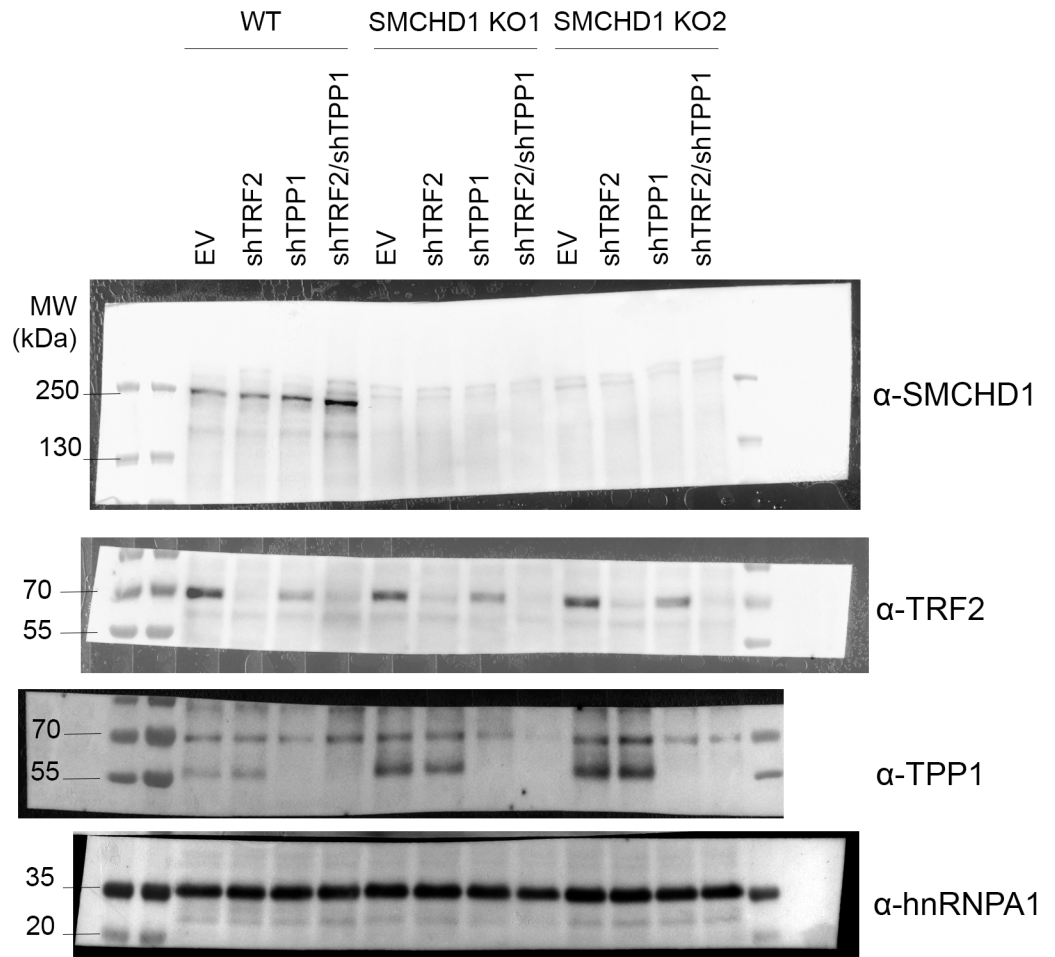

Supplement: EMBJ-39-e102668-s006.pdf [file EMBJ-39-e102668-s006.pdf]
